# Supplementary material
Source: PubMed Central journal article supplement (PMC7075912)
Supplement: 41386_2019_573_MOESM5_ESM.pdf [file 41386_2019_573_MOESM5_ESM.pdf]

**Supplementary Figure S6. Forest plot: Subgroup analysis, factors related to patients' demographic and clinical characteristics**

**A. Mean age**

**1. Relapse/Hospitalization**

**1.1 Relapse (primary outcome)**

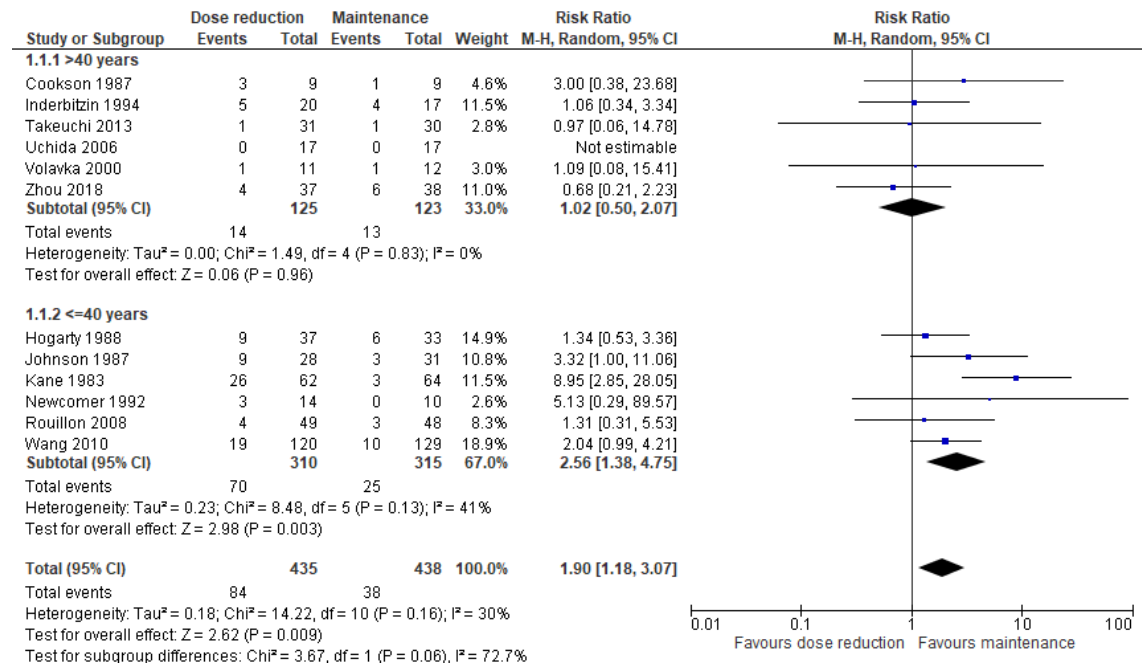

**1.2 Hospitalization**

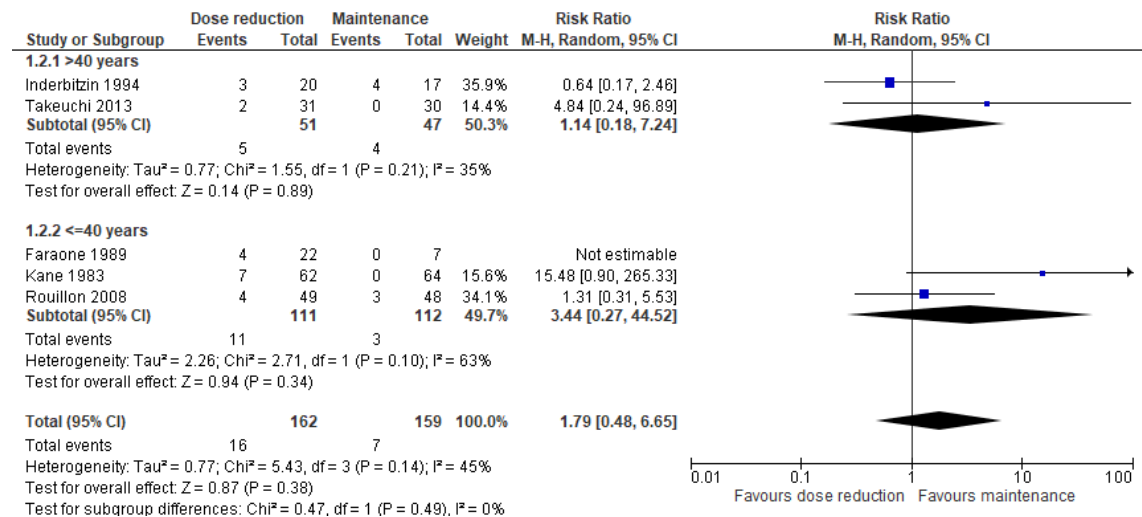

**2. Study discontinuation**

**2.1 Study discontinuation due to all causes**

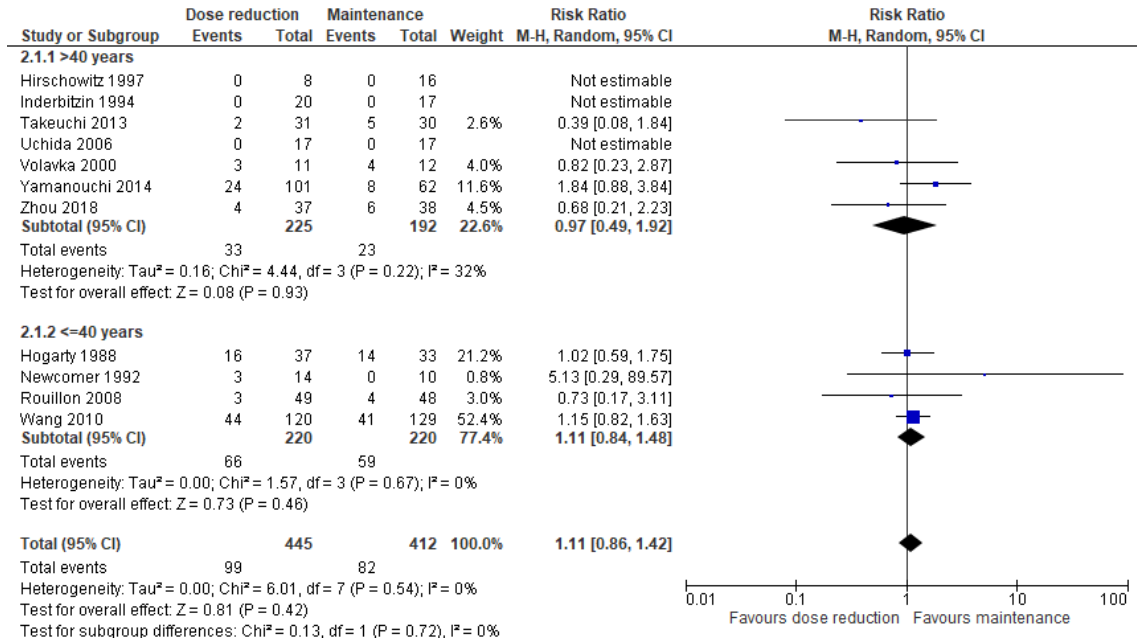

## 2.2 Study discontinuation due to inefficacy

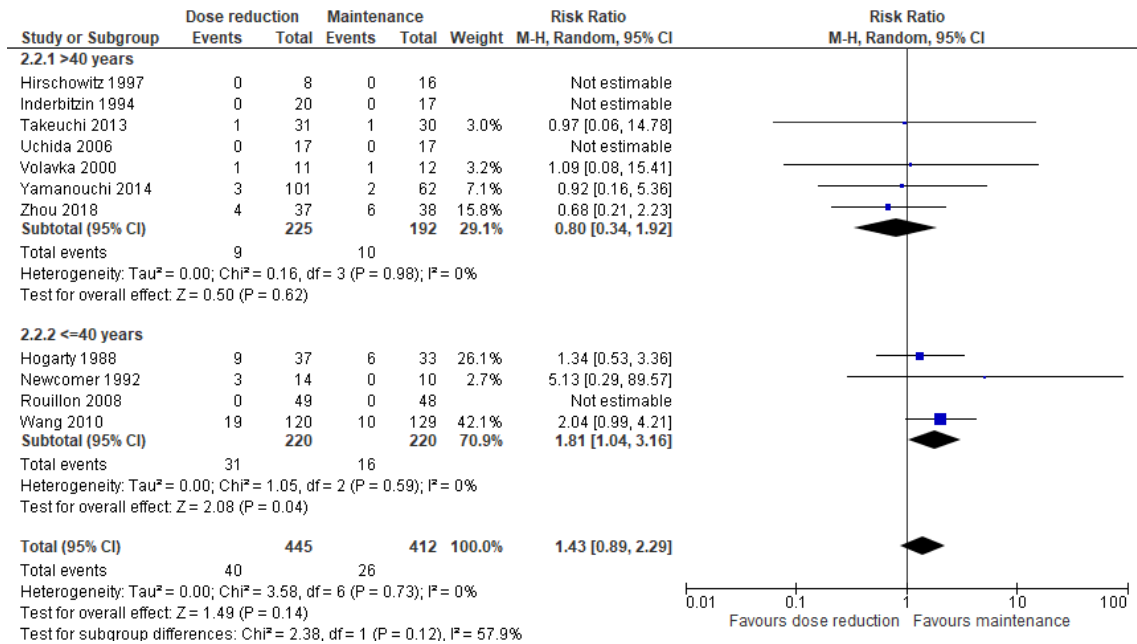

## 2.3 Study discontinuation due to intolerance

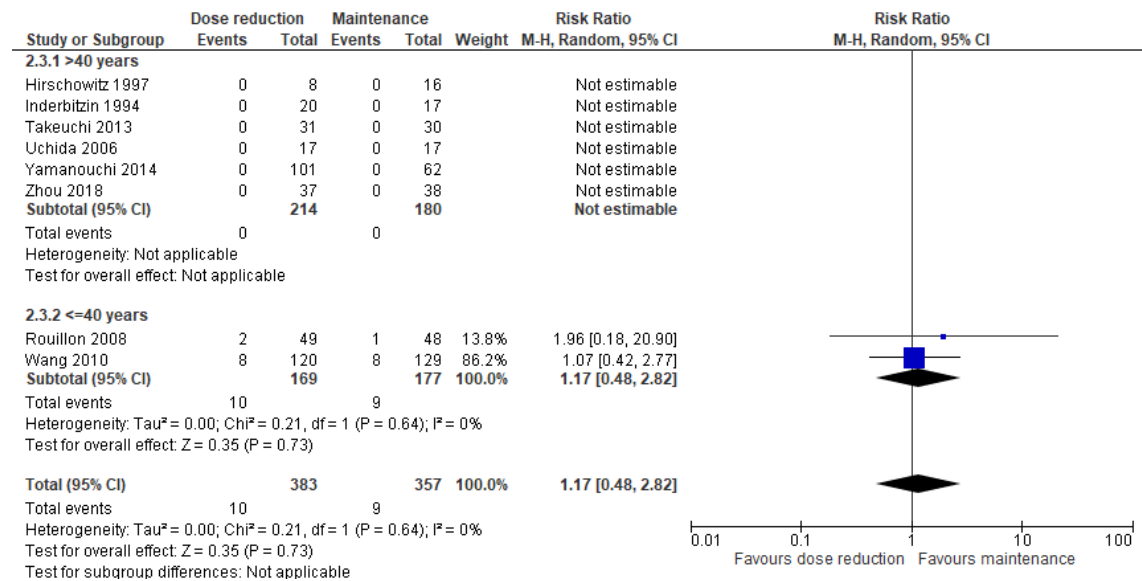

### 3. Psychopathology

#### 3.1 Total

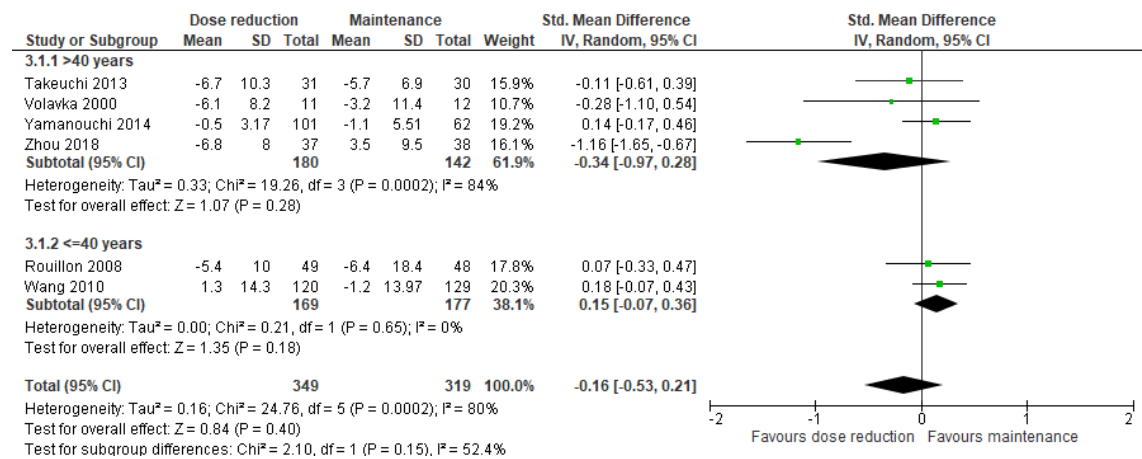

#### 3.2 Positive symptoms

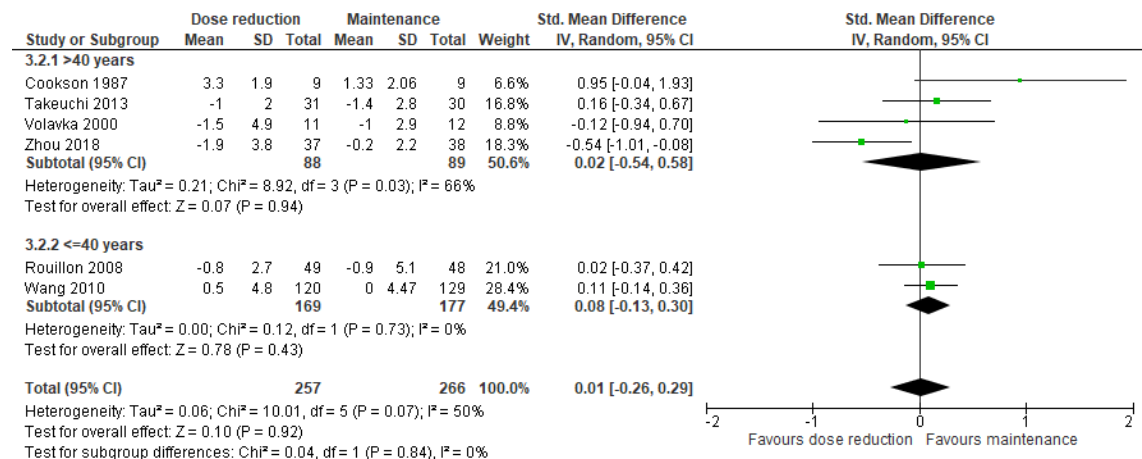

### 3.3 Negative symptoms

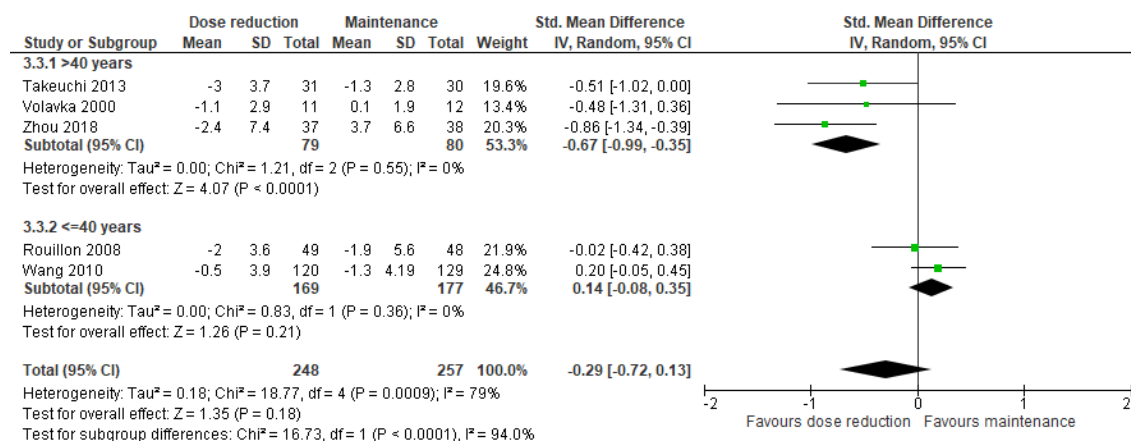

### 3.4 CGI-S

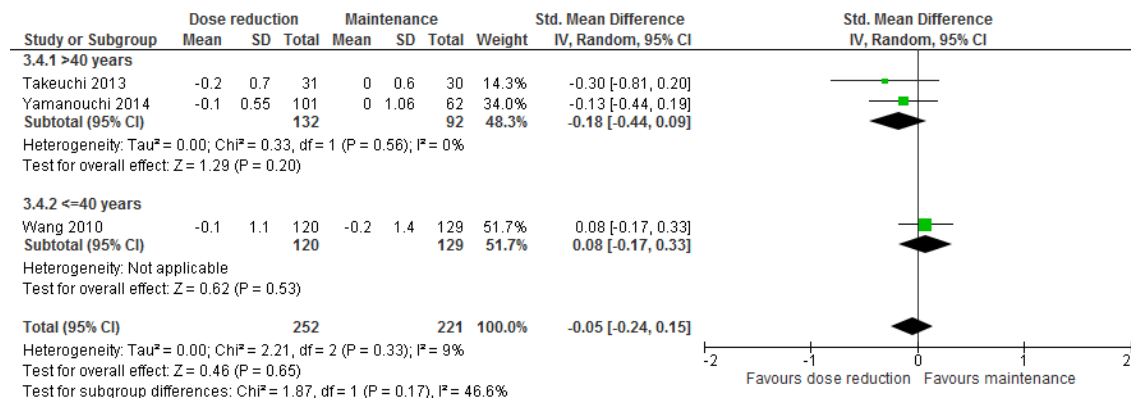

## 4. Adverse effects

### 4.1 SAS

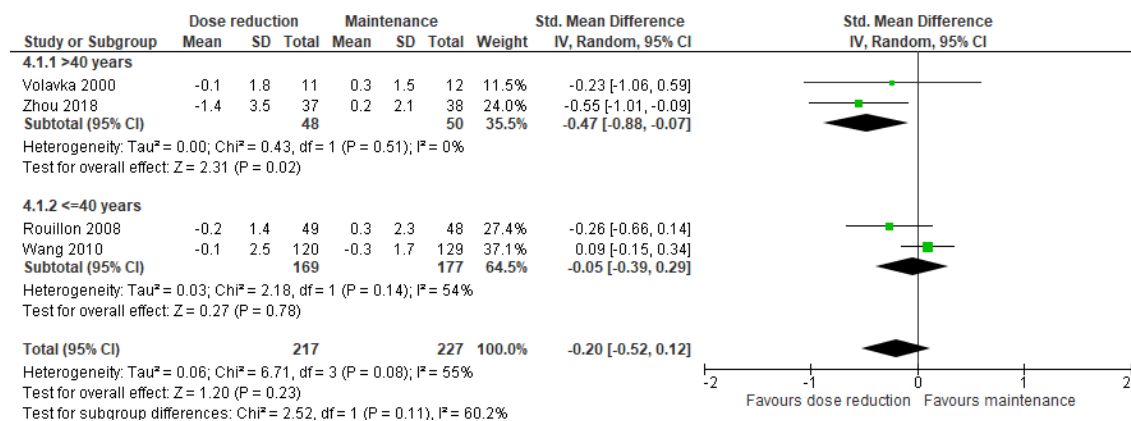

### 4.2 BARS

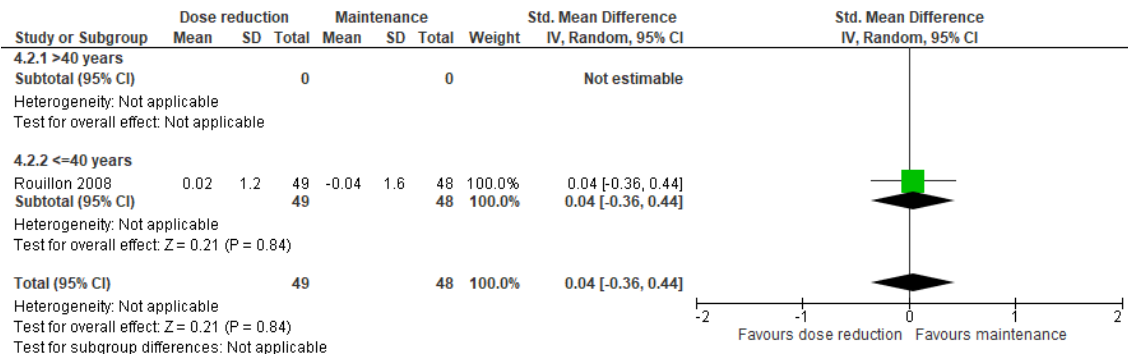

### 4.3 AIMS

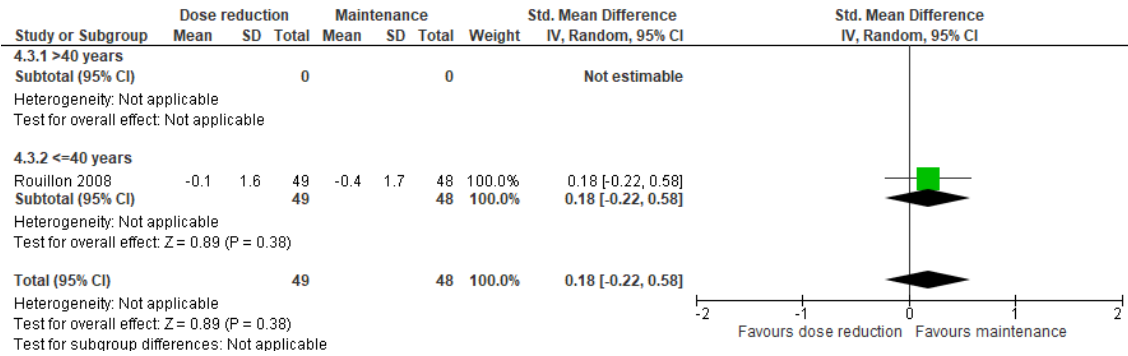

### 4.4 DIEPSS

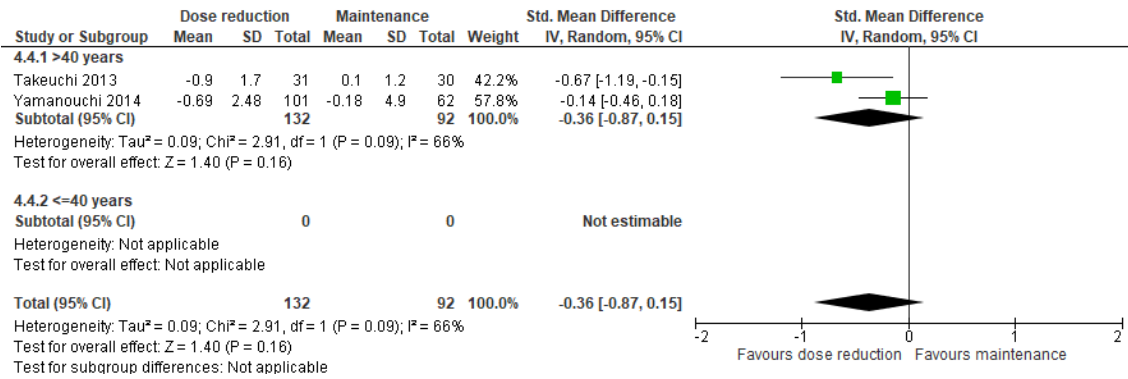

### 4.5 Body weight

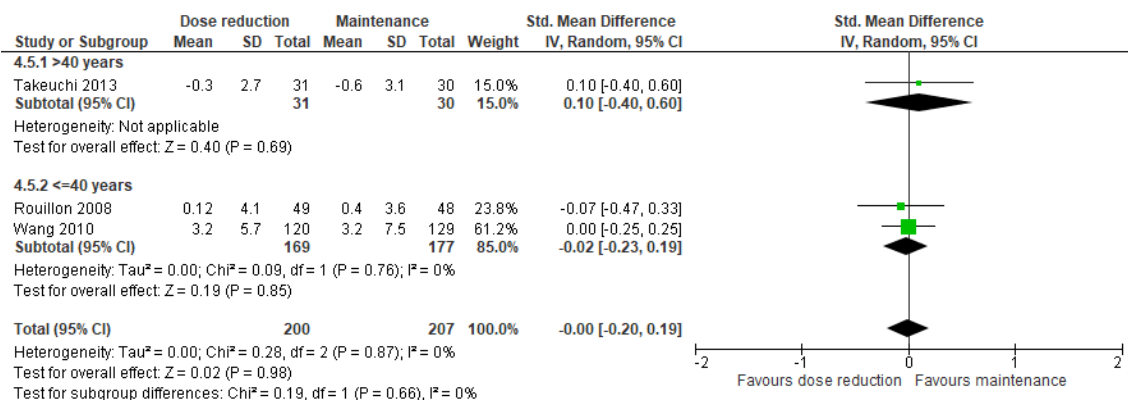

## 4.6 Neurocognition

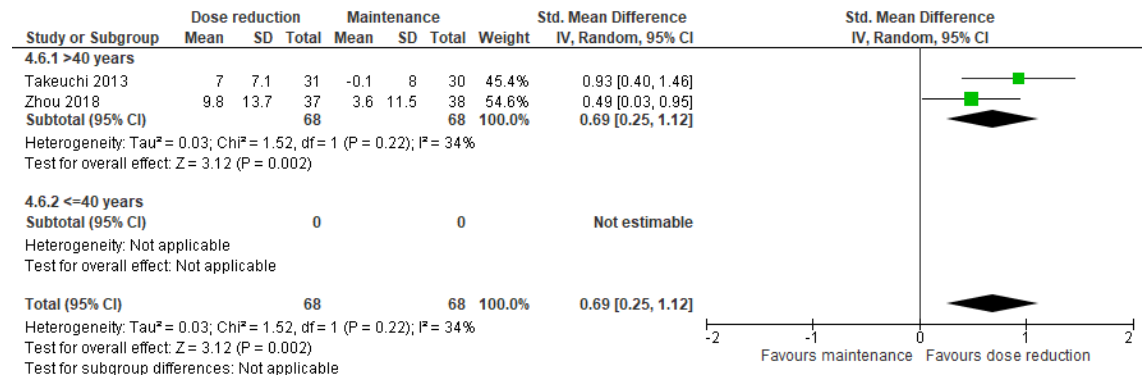

## 4.7 QOL

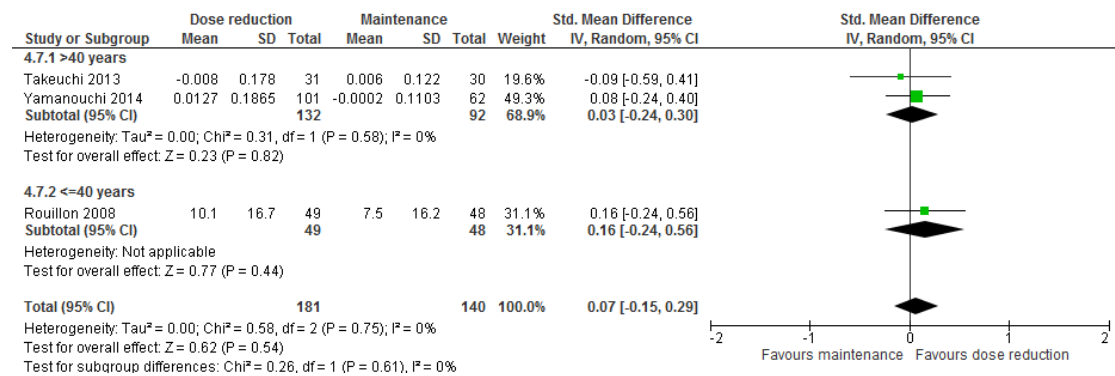

Abbreviations: AIMS, Abnormal Involuntary Movement Scale; BARS, Barnes Akathisia Rating Scale; CGI-S, Clinical Global Impressions – Severity scale; DIEPSS, Drug-Induced Extrapyrimal Symptoms Scale; QOL, quality of life; SAS, Simpson-Angus Scale

## B. Mean illness duration

### 1. Relapse/Hospitalization

#### 1.1 Relapse (primary outcome)

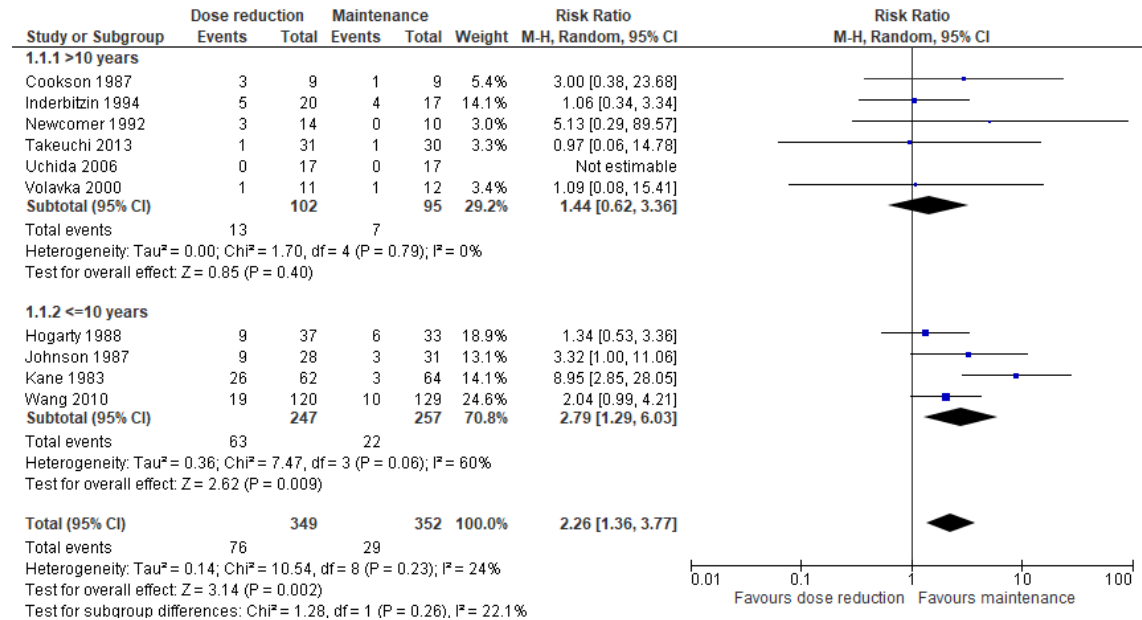

#### 1.2 Hospitalization

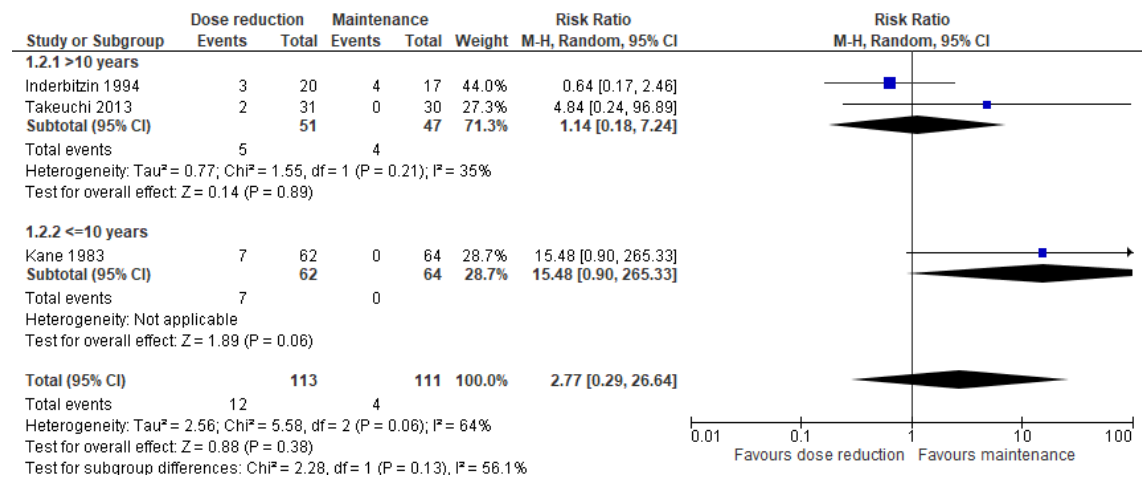

## 2. Study discontinuation

### 2.1 Study discontinuation due to all causes

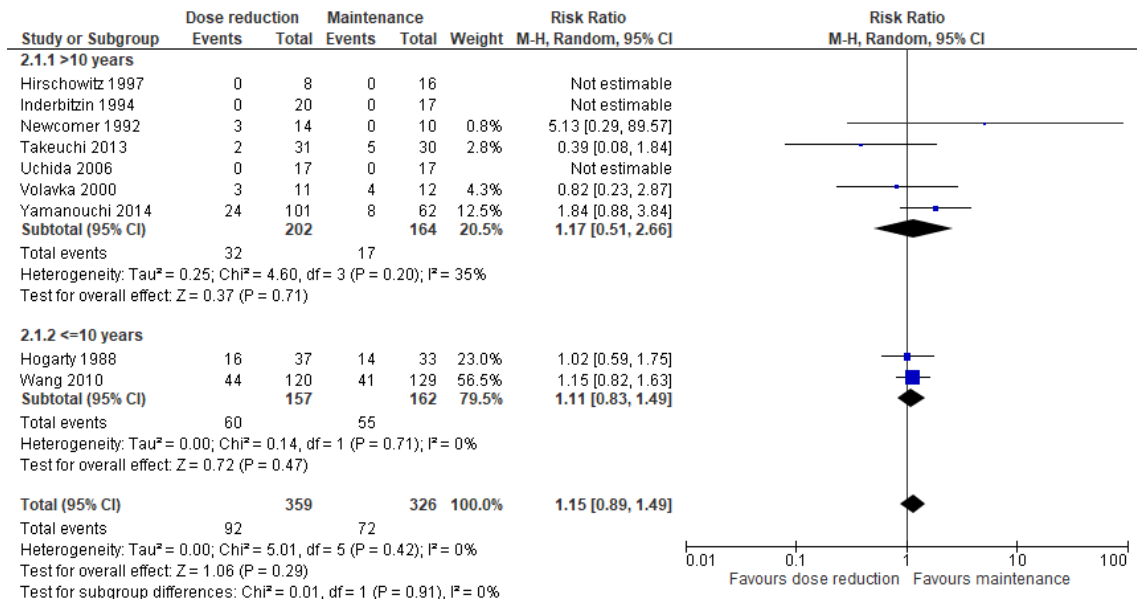

## 2.2 Study discontinuation due to inefficacy

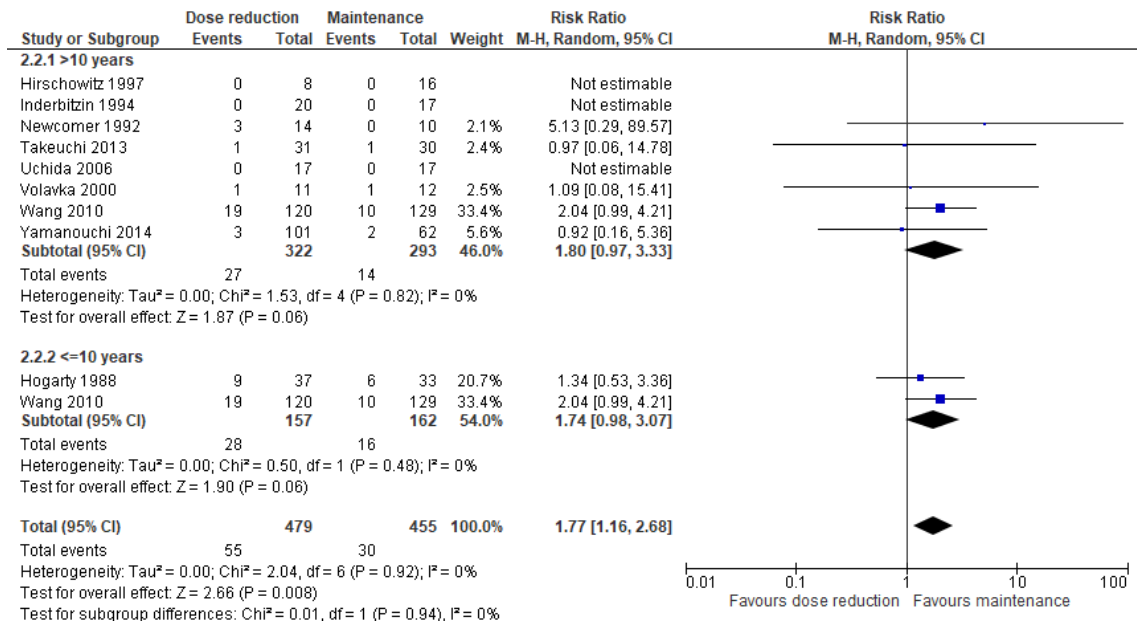

## 2.3 Study discontinuation due to intolerability



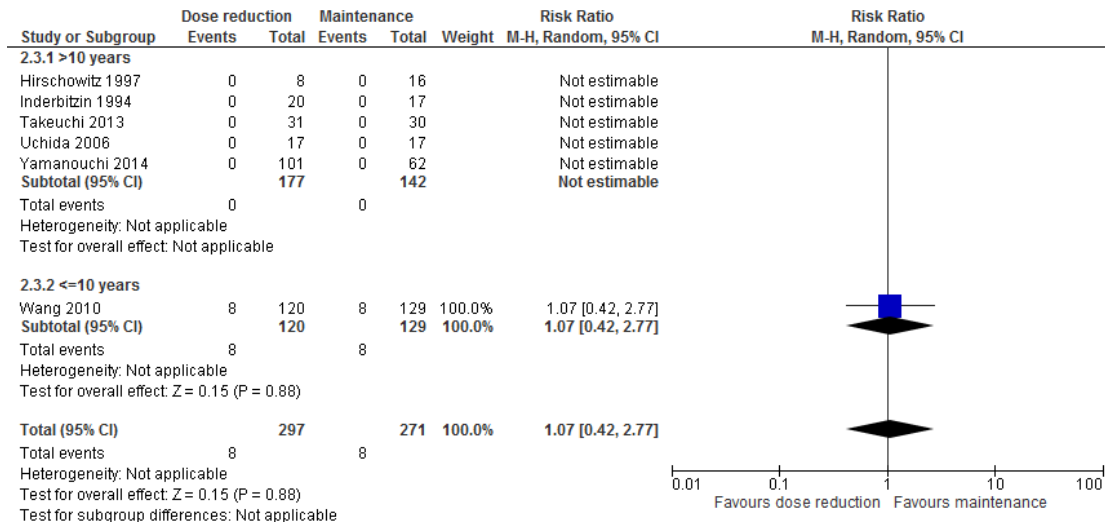

### 3. Psychopathology

#### 3.1 Total

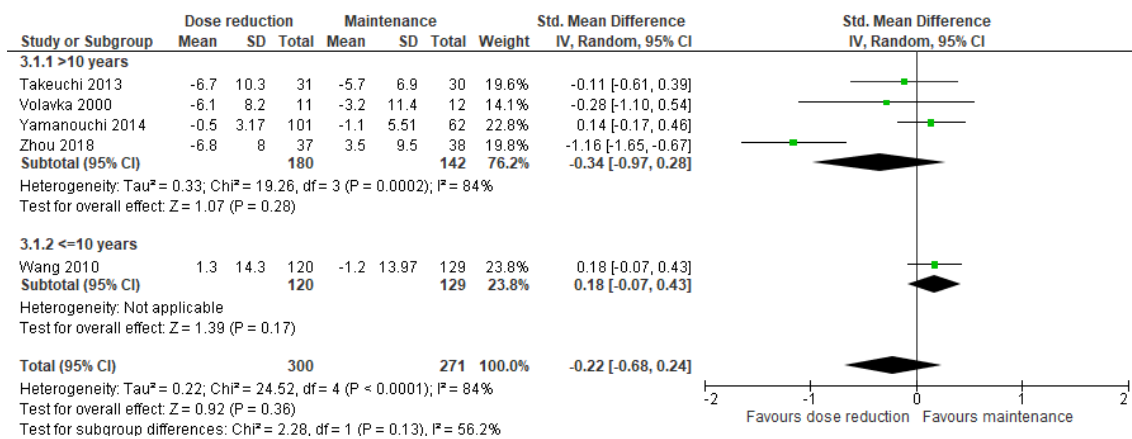

#### 3.2 Positive symptoms

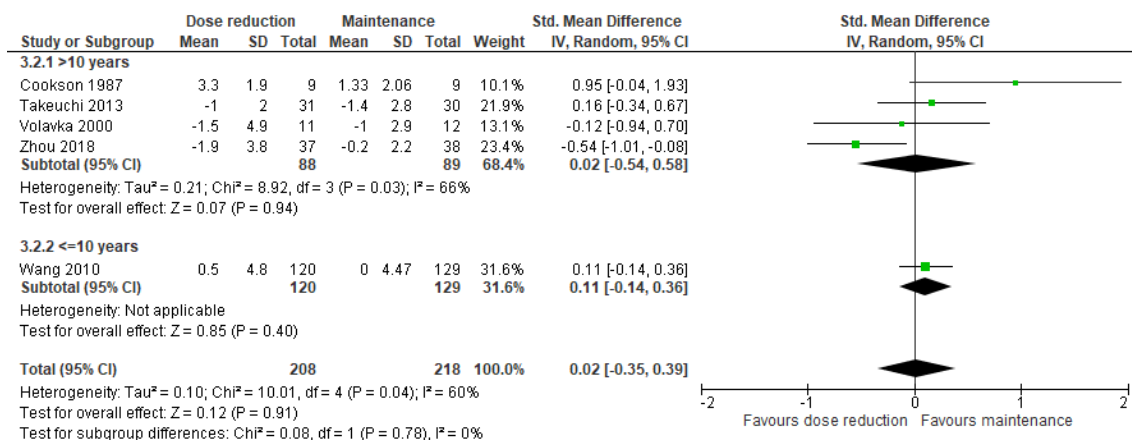

#### 3.3 Negative symptoms

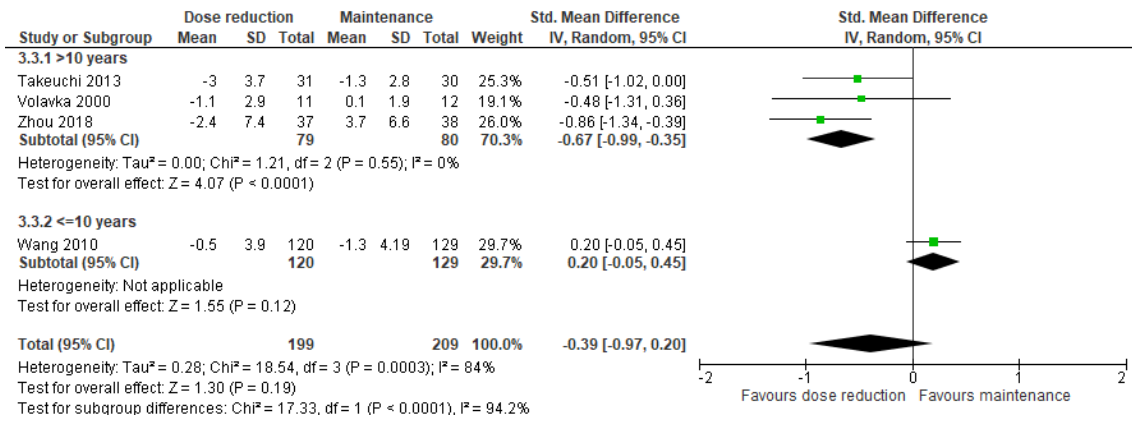

### 3.4 CGI-S

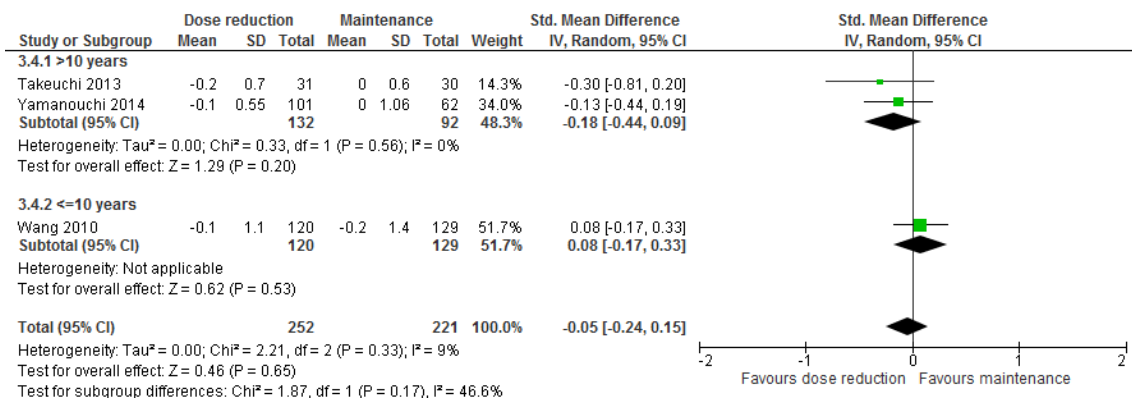

## 4. Adverse effects

### 4.1 SAS

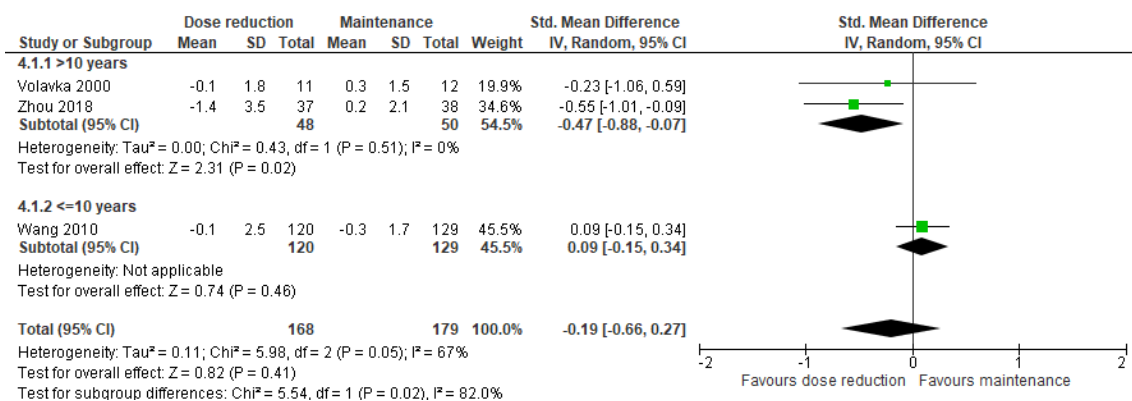

### 4.2 BARS

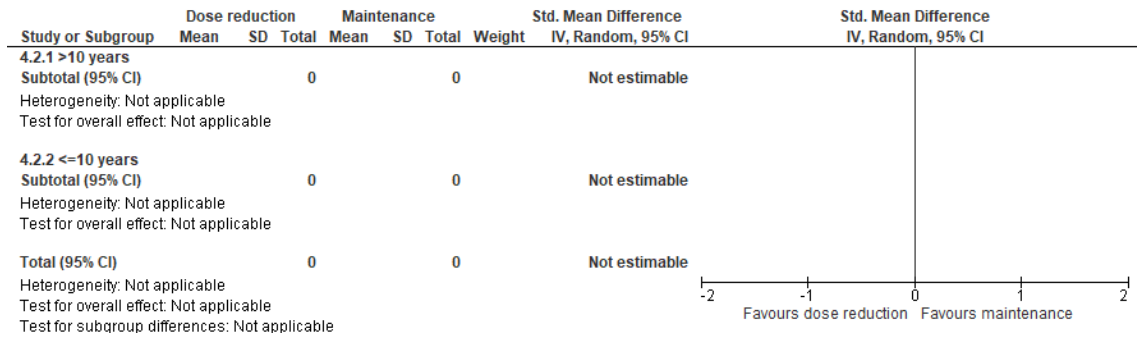

### 4.3 AIMS

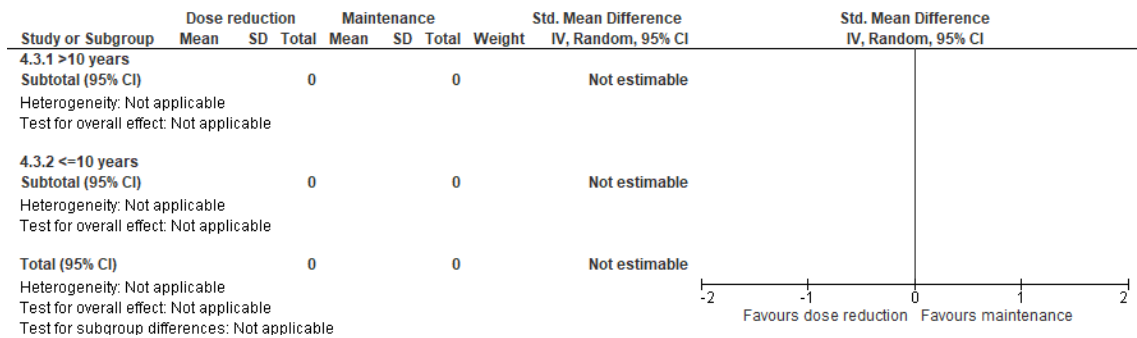

### 4.4 DIEPSS

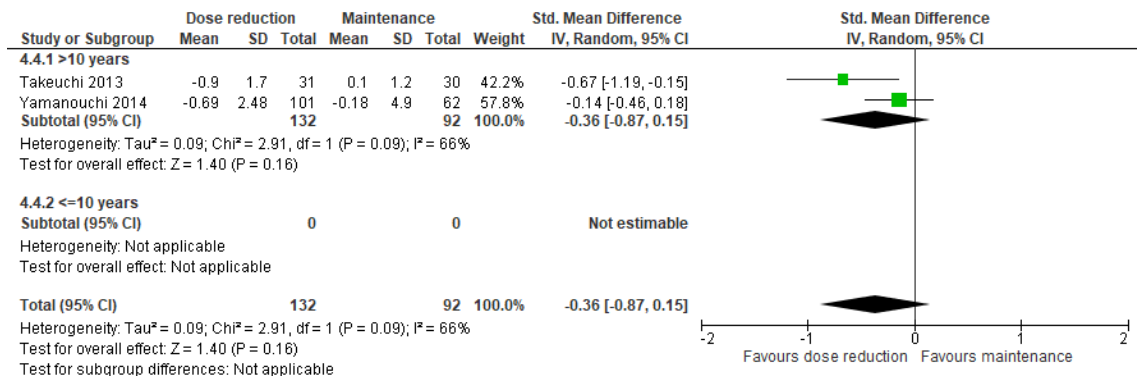

### 4.5 Body weight

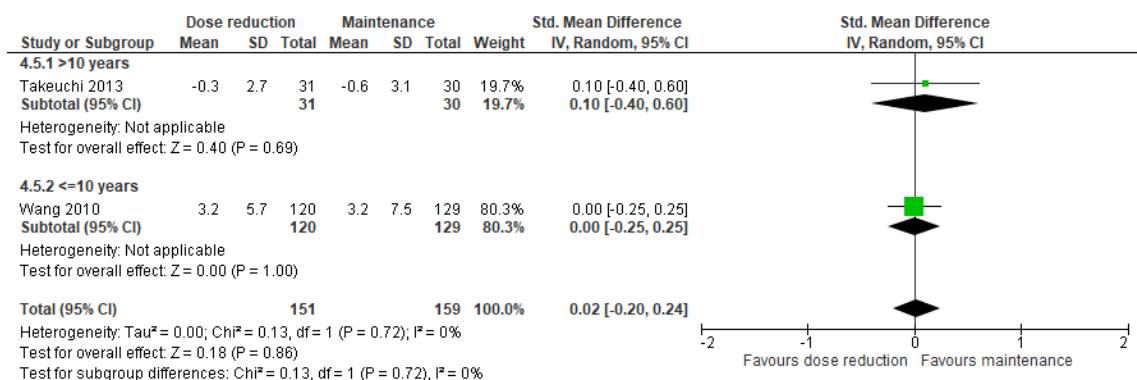

## 4.6 Neurocognition

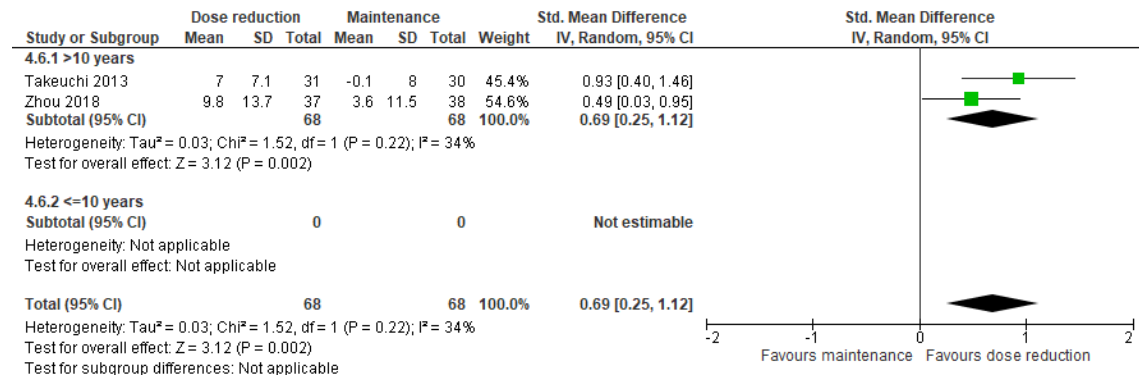

## 4.7 QOL

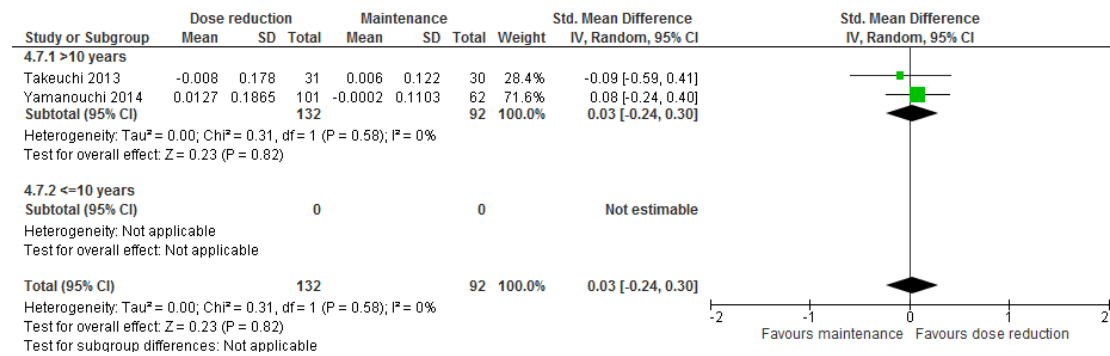

Abbreviations: AIMS, Abnormal Involuntary Movement Scale; BARS, Barnes Akathisia Rating Scale; CGI-S, Clinical Global Impressions – Severity scale; DIEPSS, Drug-Induced Extrapyrarnidal Symptoms Scale; QOL, quality of life; SAS, Simpson-Angus Scale

## C. Mean treatment duration

### 1. Relapse/Hospitalization

#### 1.1 Relapse (primary outcome)

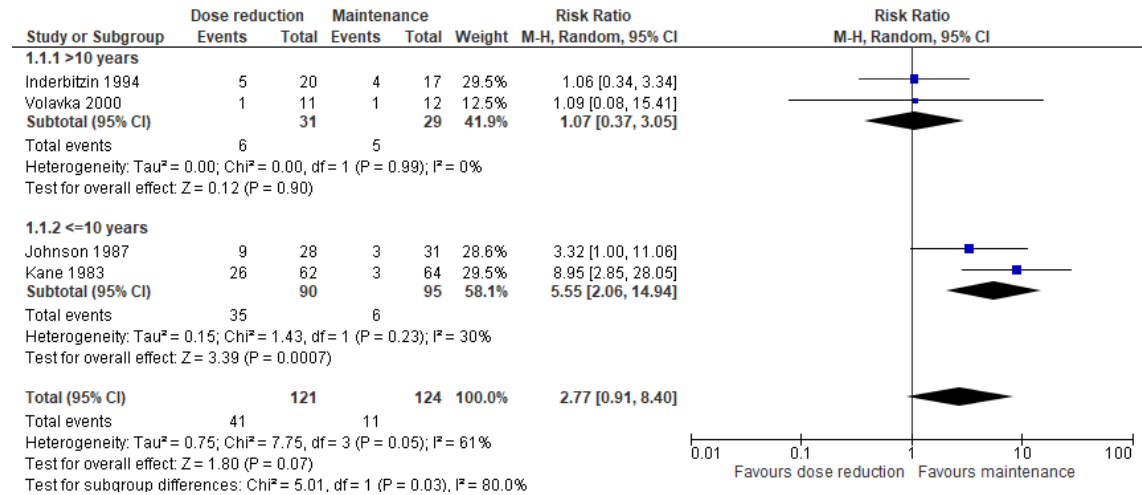

#### 1.2 Hospitalization

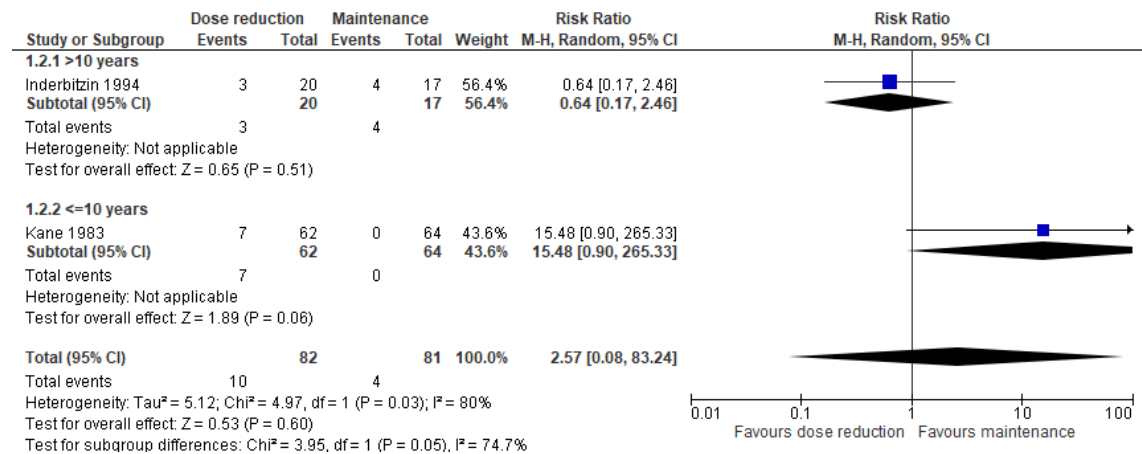

## 2. Study discontinuation

### 2.1 Study discontinuation due to all causes

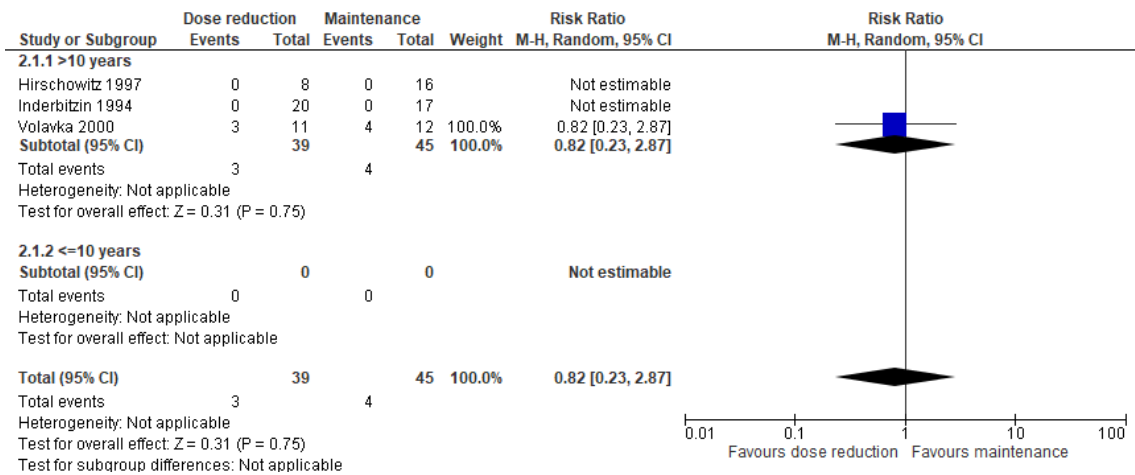

## 2.2 Study discontinuation due to inefficacy

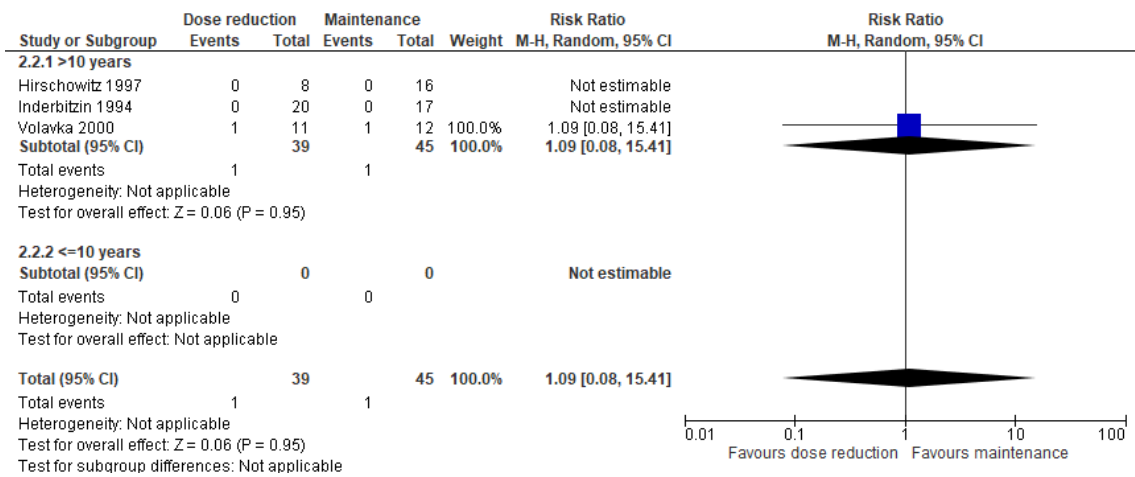

## 2.3 Study discontinuation due to intolerability

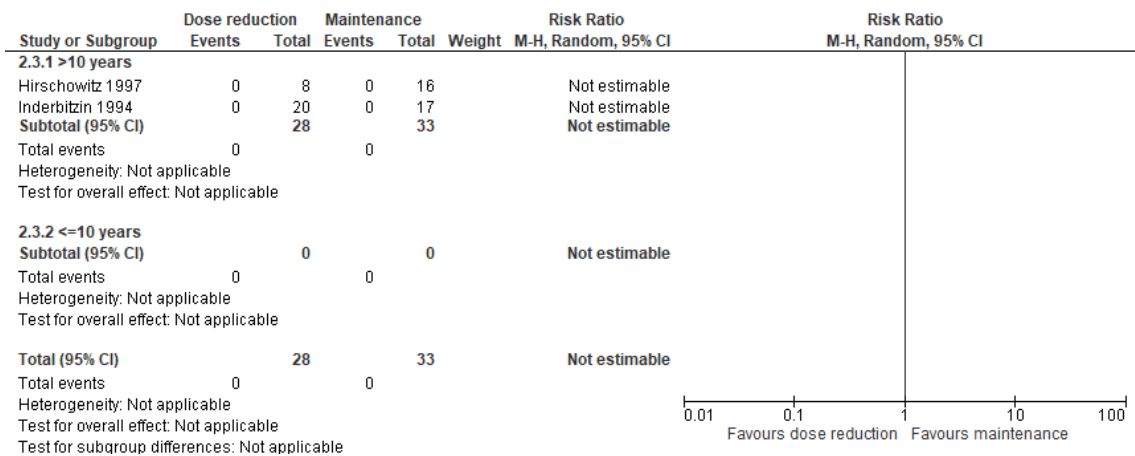

## 3. Psychopathology

### 3.1 Total

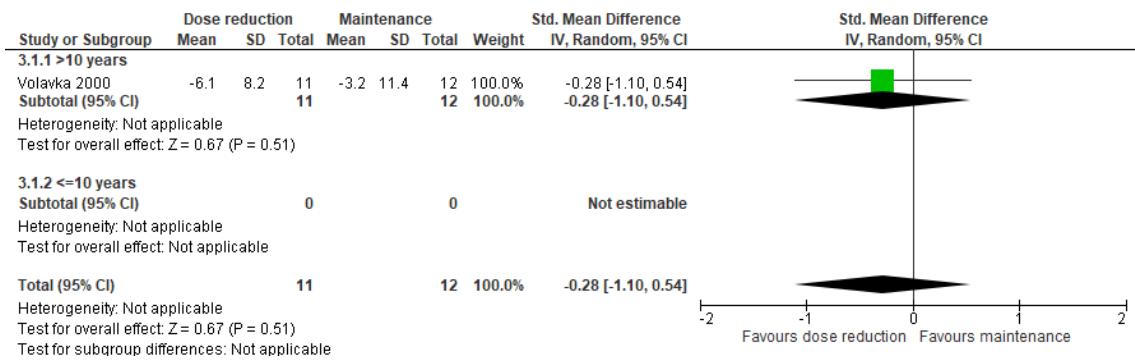

### 3.2 Positive symptoms

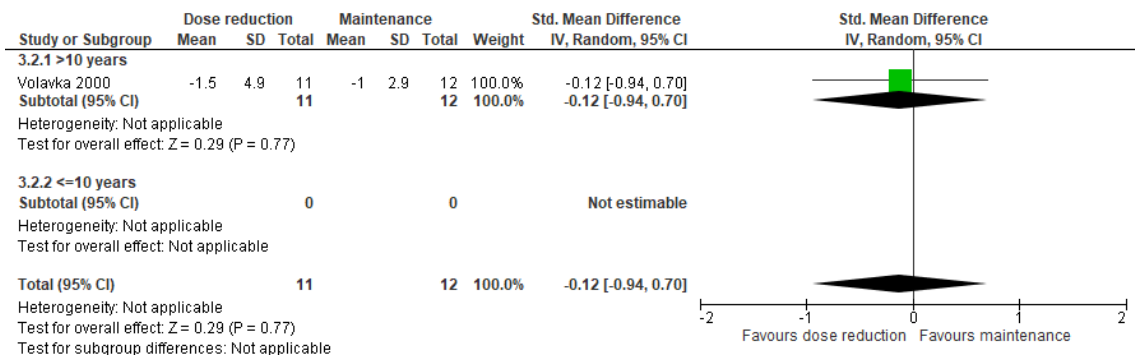

### 3.3 Negative symptoms

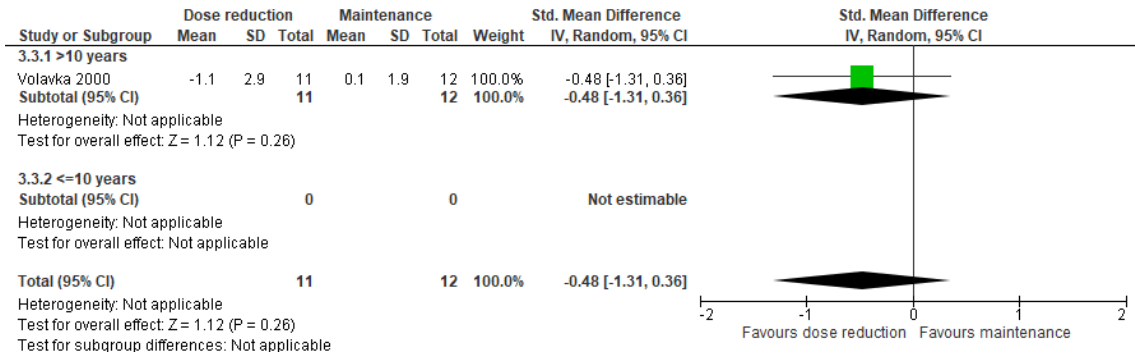

### 3.4 CGI-S

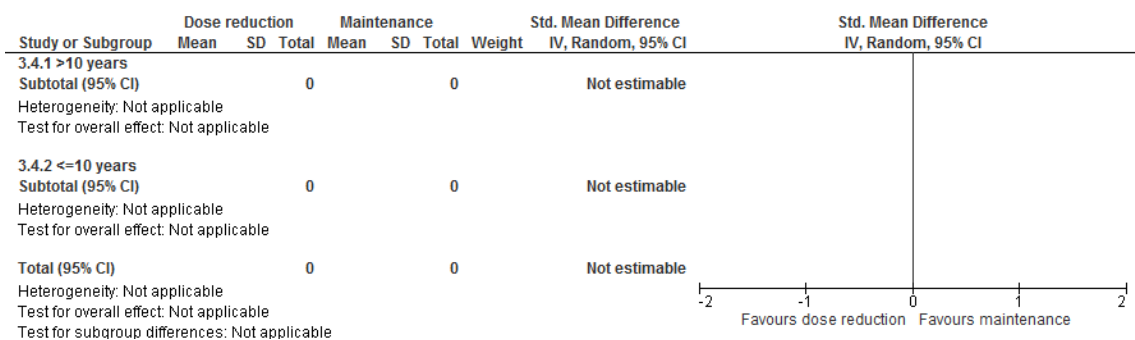

## 4. Adverse effects

### 4.1 SAS

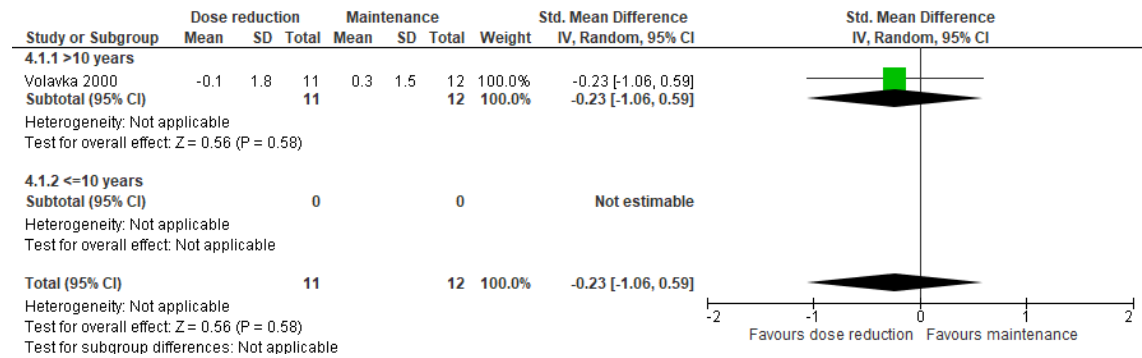

### 4.2 BARS

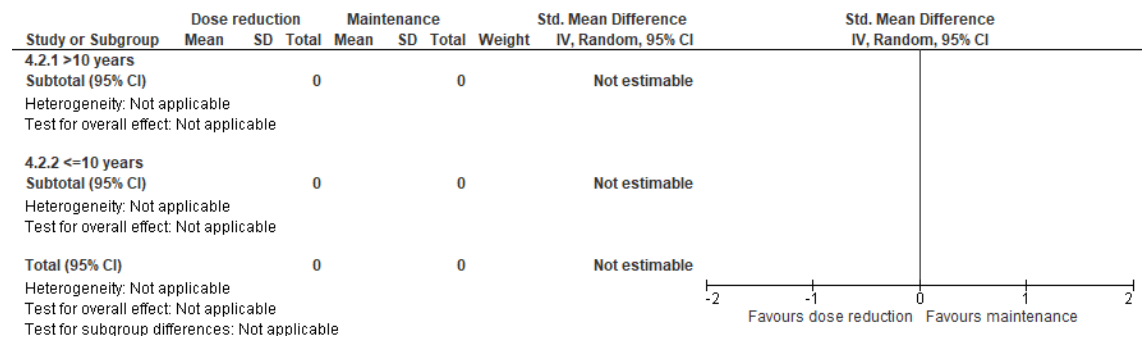

### 4.3 AIMS

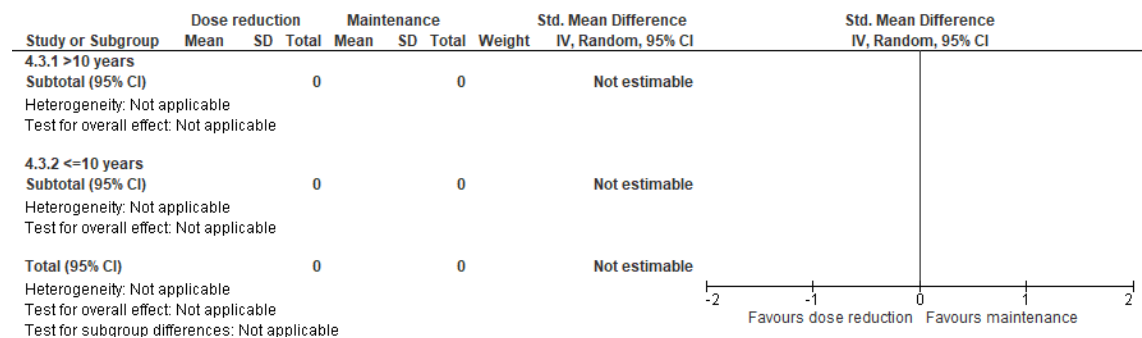

### 4.4 DIEPSS

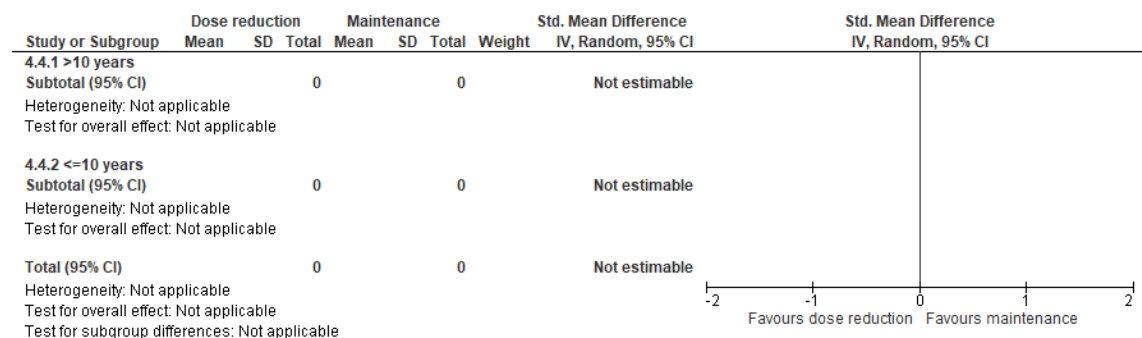



#### 4.5 Body weight

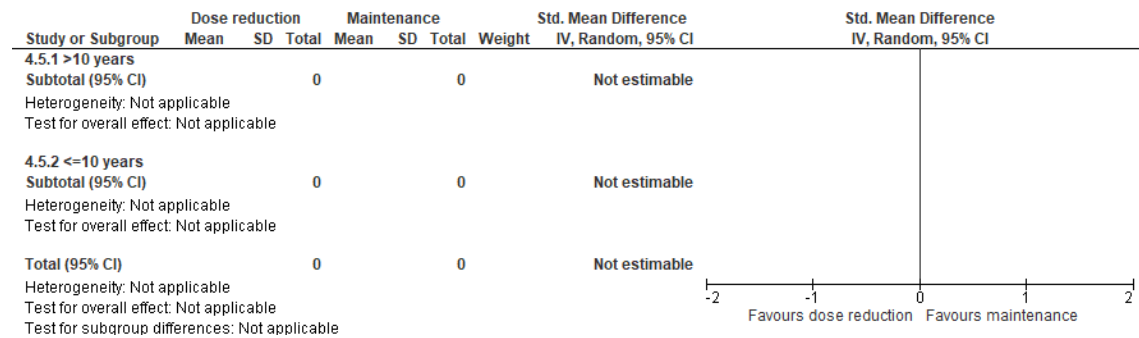

#### 4.6 Neurocognition

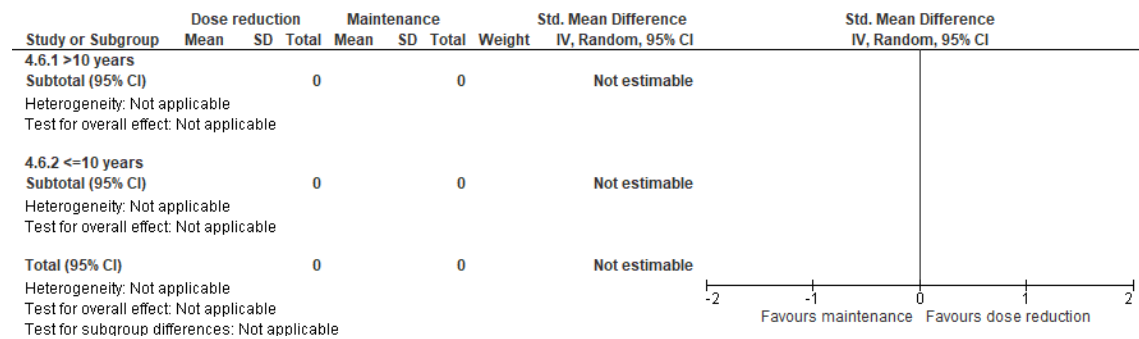

#### 4.7 QOL

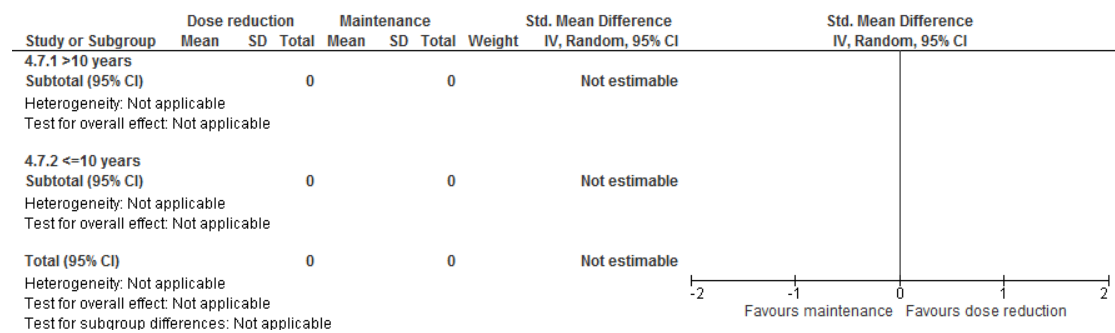

Abbreviations: AIMS, Abnormal Involuntary Movement Scale; BARS, Barnes Akathisia Rating Scale; CGI-S, Clinical Global Impressions – Severity scale; DIEPSS, Drug-Induced Extrapyrimal Symptoms Scale; QOL, quality of life; SAS, Simpson-Angus Scale

## D. Mean symptom severity

### 1. Relapse/Hospitalization

#### 1.1 Relapse (primary outcome)

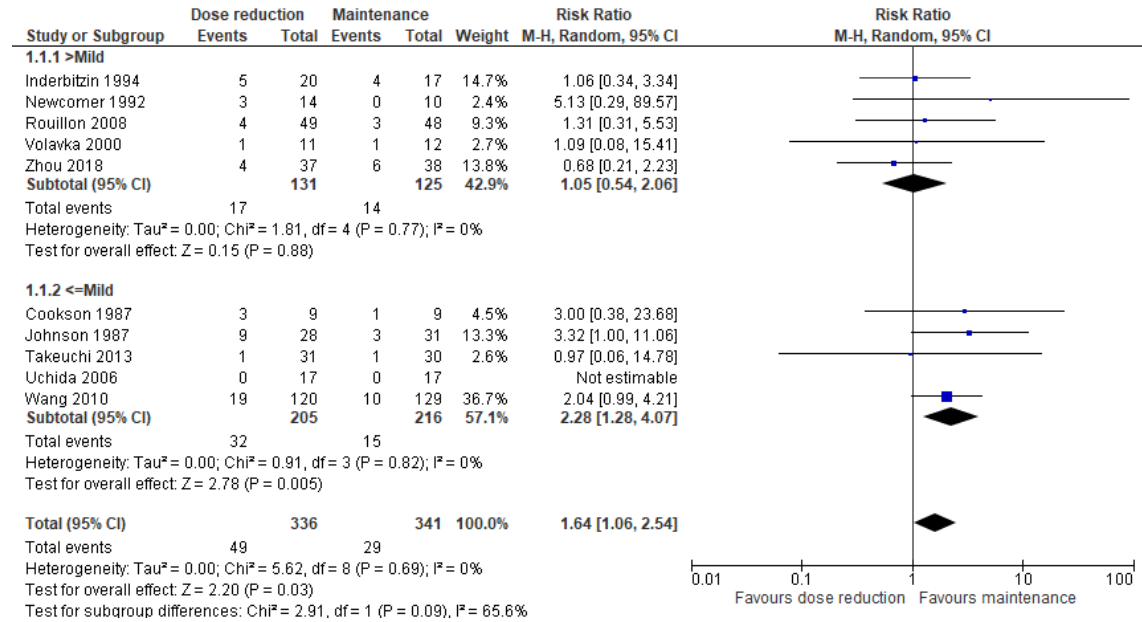

#### 1.2 Hospitalization

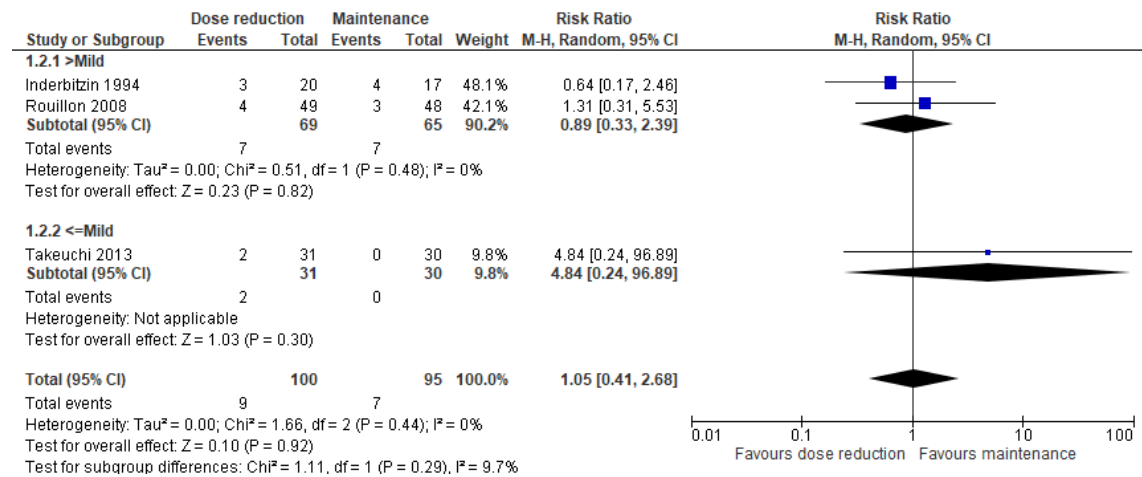

### 2. Study discontinuation

#### 2.1 Study discontinuation due to all causes

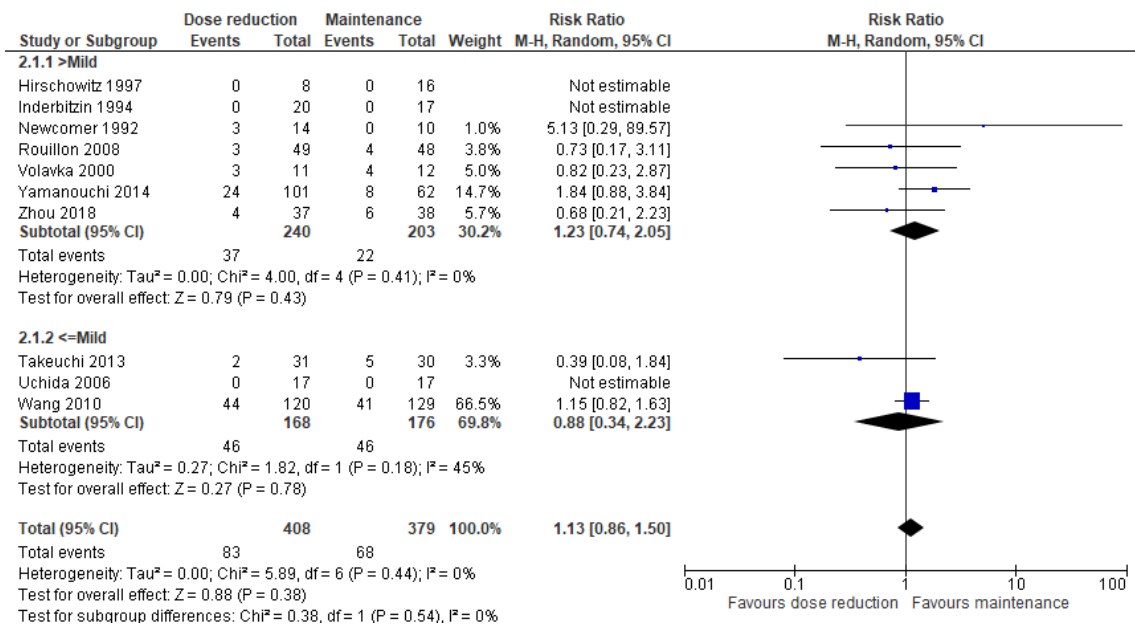

## 2.2 Study discontinuation due to inefficacy

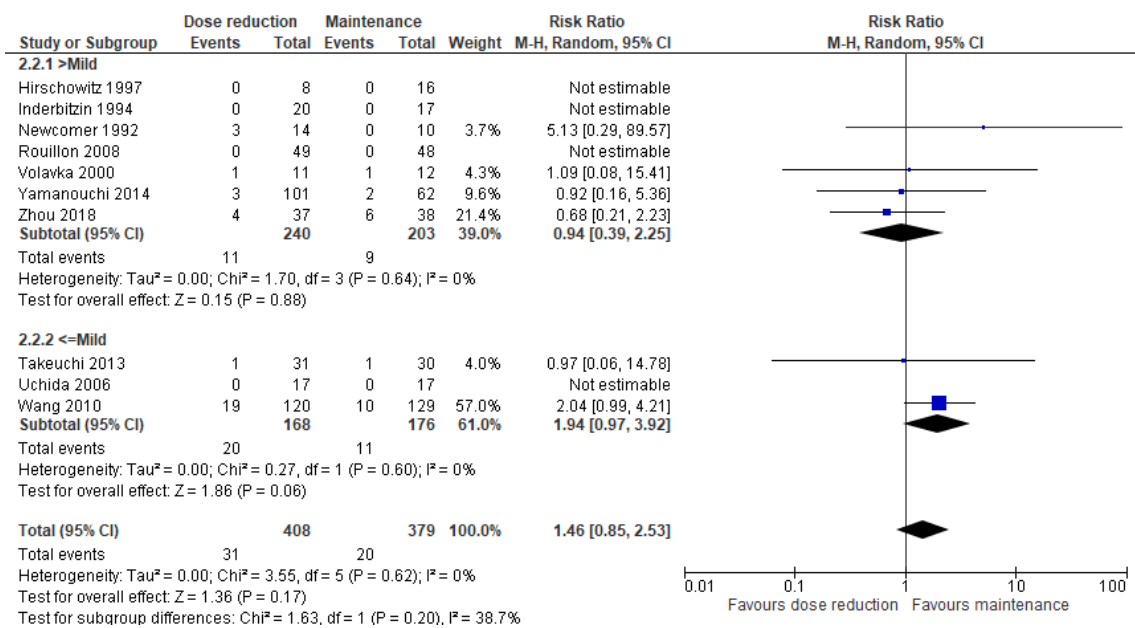

## 2.3 Study discontinuation due to intolerability

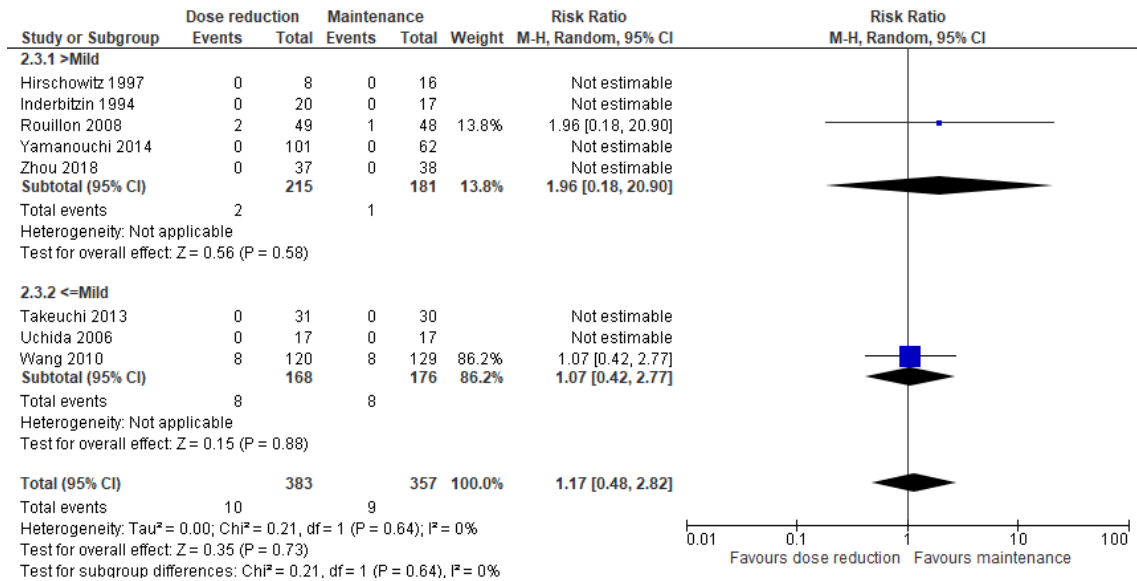

### 3. Psychopathology

#### 3.1 Total

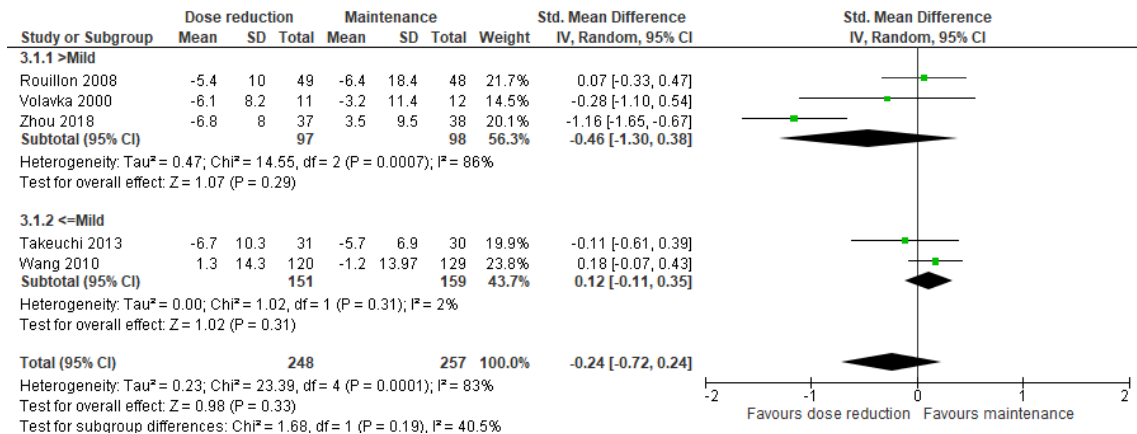

#### 3.2 Positive symptoms

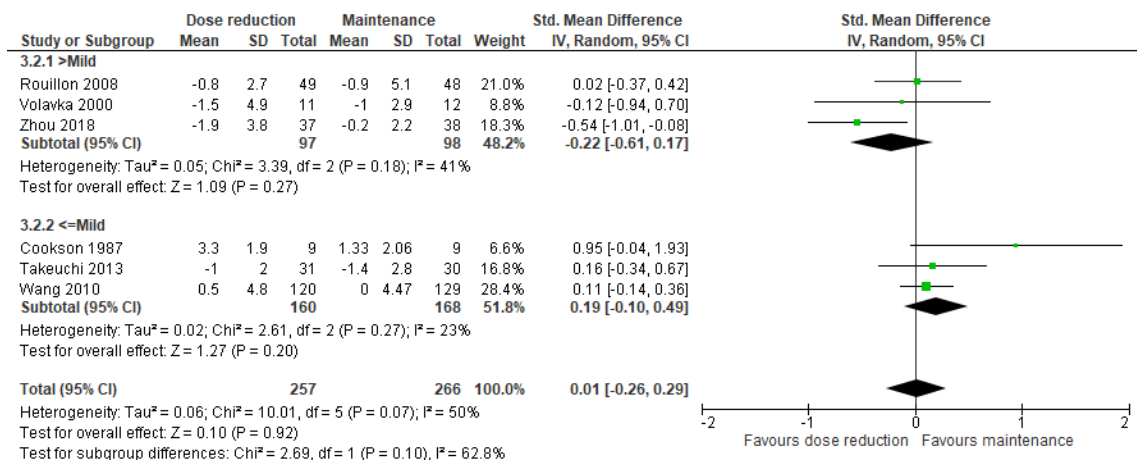

### 3.3 Negative symptoms

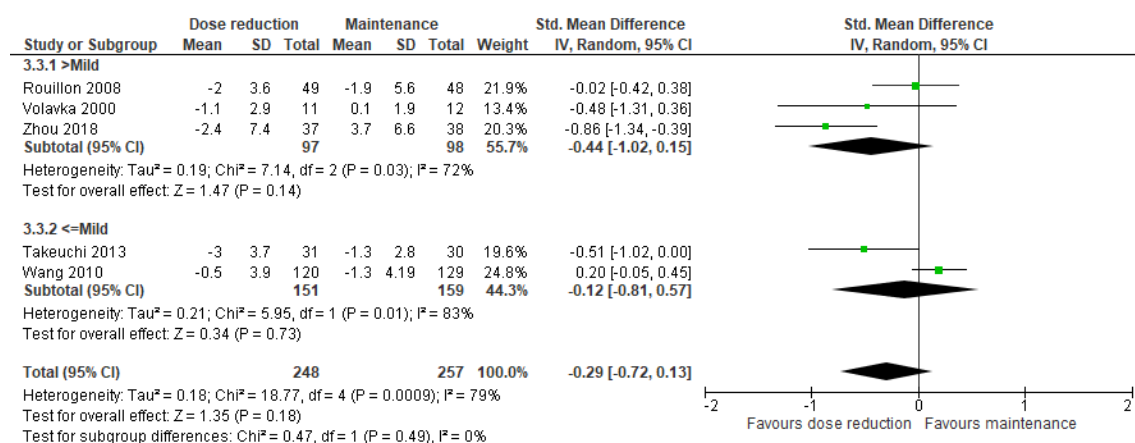

### 3.4 CGI-S

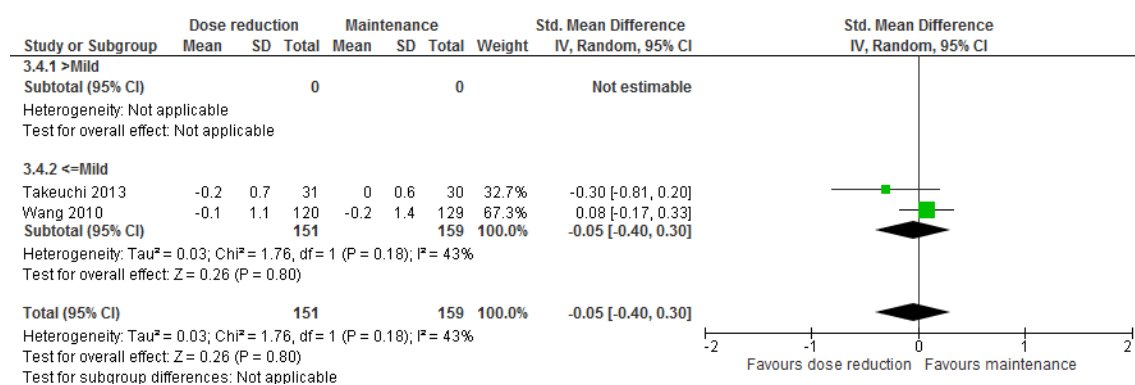

## 4. Adverse effects

### 4.1 SAS

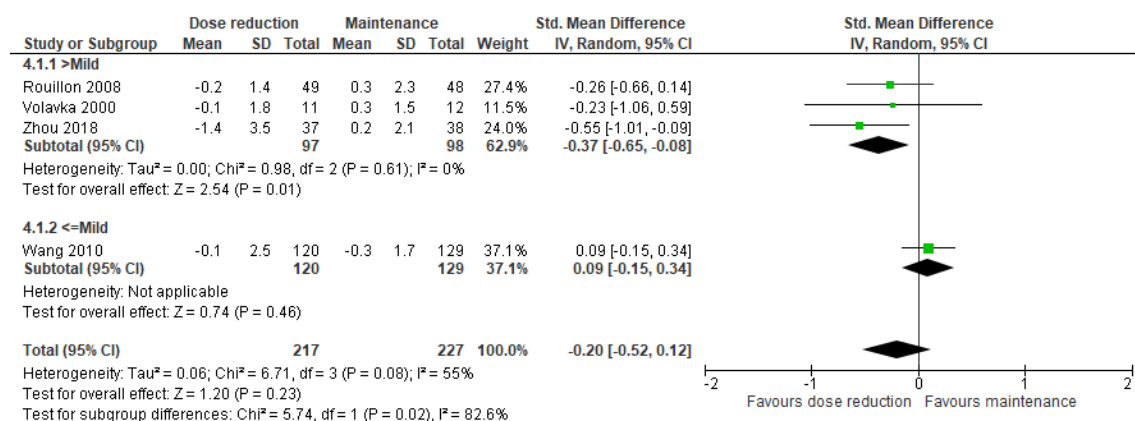

### 4.2 BARS

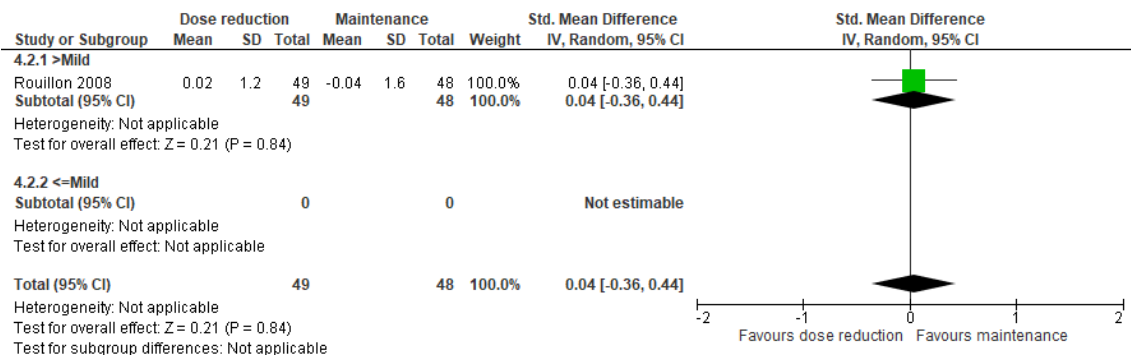

### 4.3 AIMS

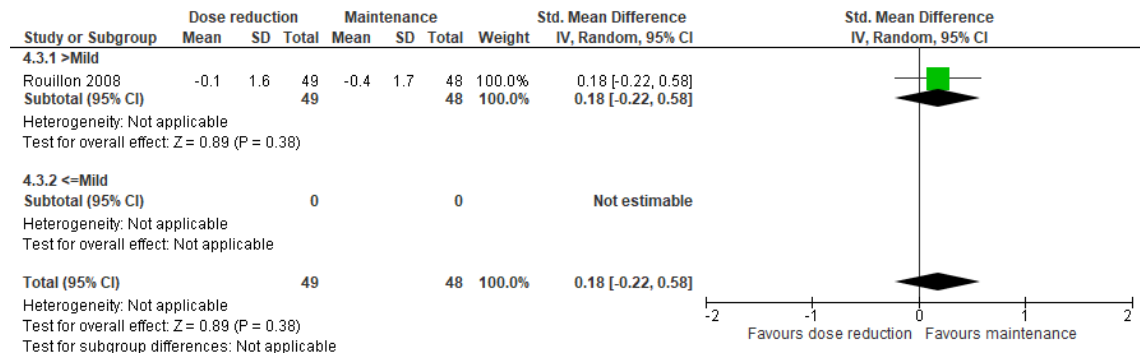

### 4.4 DIEPSS

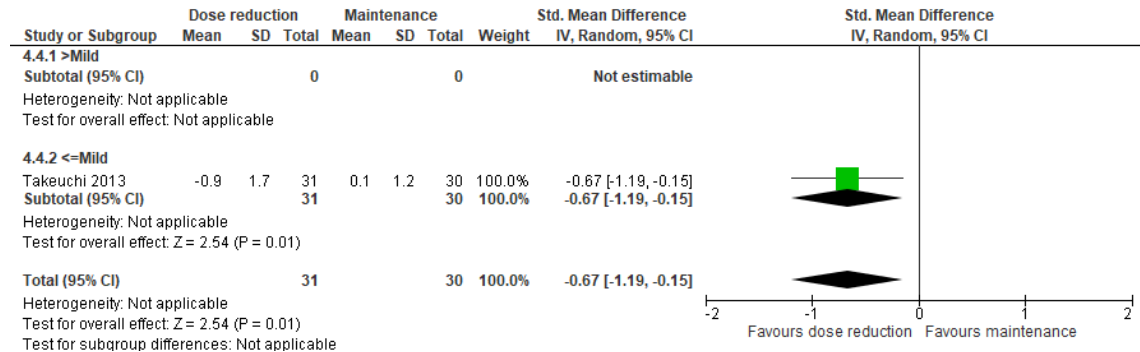

### 4.5 Body weight

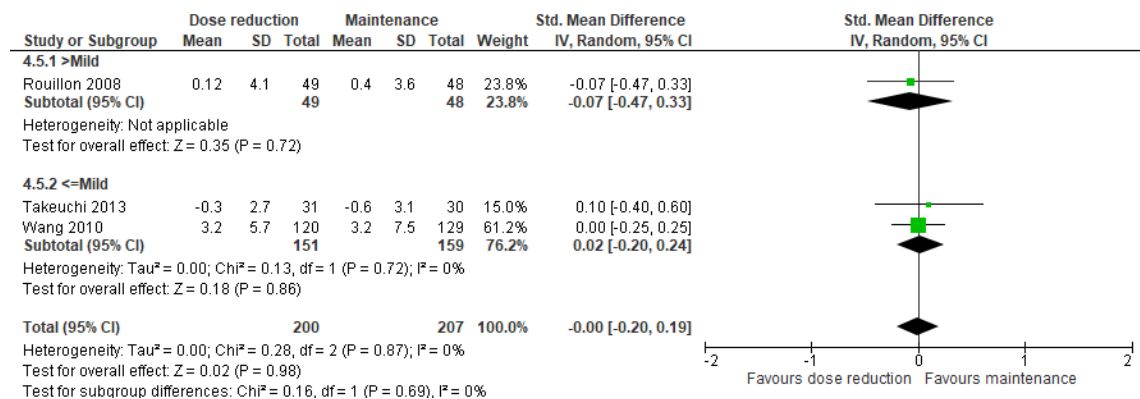

## 4.6 Neurocognition

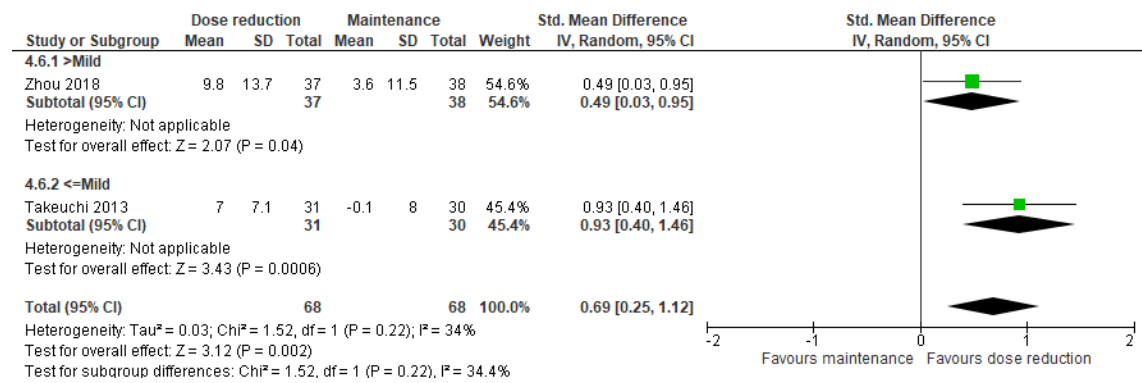

## 4.7 QOL

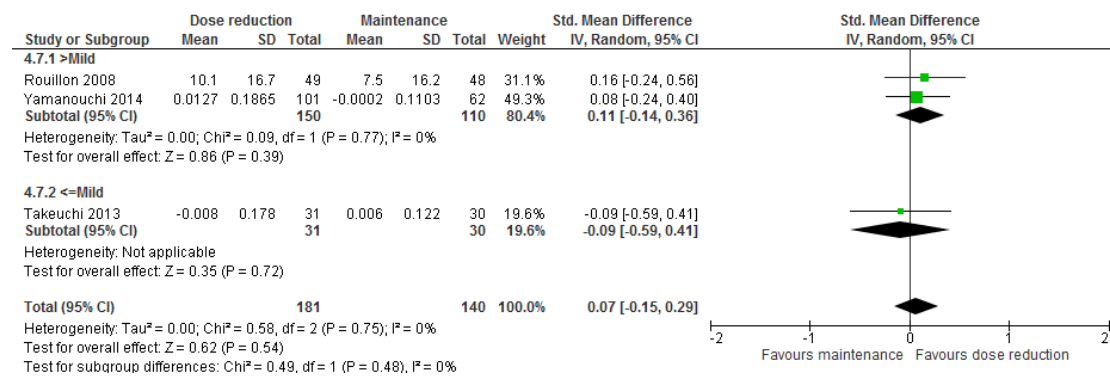

Abbreviations: AIMS, Abnormal Involuntary Movement Scale; BARS, Barnes Akathisia Rating Scale; CGI-S, Clinical Global Impressions – Severity scale; DIEPSS, Drug-Induced Extrapyrimal Symptoms Scale; QOL, quality of life; SAS, Simpson-Angus Scale
